# Supplementary material for: Phototransformation patterns of the antiplatelet drug tirofiban in aqueous solution, relevant to drug delivery and storage
Source: Royal Society of Chemistry journal article supplement (doi:10.1039/c5nj01826a), 2015-11-20
Supplement: c5nj01826a1.pdf [file c5nj01826a1.pdf]

Electronic Supplementary Material (ESI) for New Journal of Chemistry.  
This journal is © The Royal Society of Chemistry and the Centre National de la Recherche Scientifique 2015

## Supporting Information

### Phototransformation-Pattern of Antiplatelet Drug Tirofiban in Aqueous

#### Solution, Relevant to Drug Delivery and Storage.

Théo Henri<sup>1a</sup>, Philippe-Henri Secrétan<sup>1a</sup>, Fatma Amrani<sup>1</sup>, Hassane Sadou Yaye<sup>1,3</sup>,  
Melisande Bernard<sup>2</sup>, Audrey Solgadi<sup>4</sup>, Najet Yagoubi<sup>1</sup> and Bernard Do<sup>1,2\*</sup>

**Table S1.** Relative retention times (rRTs), accurate masses with errors, elemental compositions, H/D exchange and MS<sup>n</sup> product ions of the photoproducts.

| Precursor ion (number of labile hydrogens using H/D exchange) | MS <sup>n</sup> mode    | Best possible elemental formulae                                             | Theoretical mass m/z | Measured Accurate mass m/z | Relative error (ppm) | Relative retention time (Tirofiban's retention time : 8.5 min) |
|---------------------------------------------------------------|-------------------------|------------------------------------------------------------------------------|----------------------|----------------------------|----------------------|----------------------------------------------------------------|
| <b>PD-1 (6)</b>                                               | Precursor ion           | C <sub>22</sub> H <sub>37</sub> N <sub>2</sub> O <sub>7</sub> S <sup>+</sup> | 473.23160            | 473.23043                  | -2.4724              | 0.4                                                            |
|                                                               | MS <sup>2</sup> (473->) | C <sub>22</sub> H <sub>35</sub> N <sub>2</sub> O <sub>5</sub> S <sup>+</sup> | 439.22612            | 439.22484                  | -2.9142              |                                                                |
|                                                               | MS <sup>2</sup> (473->) | C <sub>20</sub> H <sub>31</sub> N <sub>2</sub> O <sub>6</sub> S <sup>+</sup> | 427.18973            | 427.18870                  | -2.4111              |                                                                |
|                                                               | MS <sup>2</sup> (473->) | C <sub>21</sub> H <sub>33</sub> N <sub>2</sub> O <sub>3</sub> S <sup>+</sup> | 393.22064            | 393.21995                  | -1.7547              |                                                                |
|                                                               | MS <sup>2</sup> (473->) | C <sub>18</sub> H <sub>29</sub> N <sub>2</sub> O <sub>5</sub> <sup>+</sup>   | 353.20710            | 353.20609                  | -2.8595              |                                                                |
|                                                               | MS <sup>2</sup> (473->) | C <sub>20</sub> H <sub>30</sub> NO <sub>3</sub> S <sup>+</sup>               | 364.19409            | 364.19303                  | -2.9105              |                                                                |
|                                                               | MS <sup>2</sup> (473->) | C <sub>9</sub> H <sub>18</sub> NO <sub>2</sub> <sup>+</sup>                  | 172.13321            | 172.13257                  | -3.7181              |                                                                |
|                                                               | MS <sup>2</sup> (473->) | C <sub>9</sub> H <sub>16</sub> N <sup>+</sup>                                | 138.12773            | 138.12724                  | -3.5474              |                                                                |
| <b>PD-2 (5)</b>                                               | Precursor ion           | C <sub>22</sub> H <sub>37</sub> N <sub>2</sub> O <sub>6</sub> S <sup>+</sup> | 457.23668            | 457.23549                  | -2.6026              | 0.48                                                           |
|                                                               | MS <sup>2</sup> (457->) | C <sub>21</sub> H <sub>33</sub> N <sub>2</sub> O <sub>3</sub> S <sup>+</sup> | 393.22064            | 393.22013                  | -1.2970              |                                                                |
|                                                               | MS <sup>2</sup> (457->) | C <sub>20</sub> H <sub>30</sub> NO <sub>3</sub> S <sup>+</sup>               | 364.19409            | 364.1931                   | -2.7183              |                                                                |
|                                                               | MS <sup>2</sup> (457->) | C <sub>18</sub> H <sub>29</sub> N <sub>2</sub> O <sub>4</sub> <sup>+</sup>   | 337.21218            | 337.21179                  | -1.1565              |                                                                |
|                                                               | MS <sup>2</sup> (457->) | C <sub>17</sub> H <sub>26</sub> NO <sub>3</sub> <sup>+</sup>                 | 292.19072            | 292.18995                  | -2.6353              |                                                                |
|                                                               | MS <sup>2</sup> (457->) | C <sub>17</sub> H <sub>24</sub> NO <sub>2</sub> <sup>+</sup>                 | 274.18016            | 274.17983                  | -1.2036              |                                                                |
|                                                               | MS <sup>2</sup> (457->) | C <sub>9</sub> H <sub>18</sub> NO <sup>+</sup>                               | 156.13829            | 156.13796                  | -2.1135              |                                                                |

|                 |                              |                                                                              |           |           |         |      |
|-----------------|------------------------------|------------------------------------------------------------------------------|-----------|-----------|---------|------|
|                 | MS <sup>2</sup> (457->)      | C <sub>9</sub> H <sub>16</sub> N <sup>+</sup>                                | 138.12773 | 138.12711 | -4.4886 |      |
|                 | MS <sup>2</sup> (457->)      | C <sub>8</sub> H <sub>13</sub> <sup>+</sup>                                  | 109.10118 | 109.10065 | -4.8579 |      |
| <b>PD-3 (5)</b> | Precursor ion                | C <sub>22</sub> H <sub>35</sub> N <sub>2</sub> O <sub>6</sub> S <sup>+</sup> | 455.22103 | 455.21974 | -2.8338 | 0.51 |
|                 | MS <sup>2</sup> (455->)      | C <sub>22</sub> H <sub>33</sub> N <sub>2</sub> O <sub>5</sub> S <sup>+</sup> | 437.21047 | 437.20997 | -1.1436 |      |
|                 | MS <sup>2</sup> (455->)      | C <sub>21</sub> H <sub>33</sub> N <sub>2</sub> O <sub>4</sub> S <sup>+</sup> | 409.21555 | 409.21429 | -3.0791 |      |
|                 | MS <sup>2</sup> (455->)      | C <sub>18</sub> H <sub>27</sub> N <sub>2</sub> O <sub>4</sub> <sup>+</sup>   | 335.19653 | 335.19602 | -1.5215 |      |
|                 | MS <sup>2</sup> (455->)      | C <sub>18</sub> H <sub>25</sub> N <sub>2</sub> O <sub>3</sub> <sup>+</sup>   | 317.18597 | 317.18556 | -1.2926 |      |
|                 | MS <sup>2</sup> (455->)      | C <sub>17</sub> H <sub>24</sub> NO <sub>3</sub> <sup>+</sup>                 | 290.17507 | 290.17471 | -1.2406 |      |
|                 | MS <sup>2</sup> (455->)      | C <sub>9</sub> H <sub>16</sub> NO <sup>+</sup>                               | 154.12264 | 154.12214 | -3.2442 |      |
|                 | MS <sup>2</sup> (455->)      | C <sub>9</sub> H <sub>14</sub> N <sup>+</sup>                                | 136.11208 | 136.11188 | -1.4694 |      |
| <b>PD-4 (6)</b> | Precursor ion                | C <sub>22</sub> H <sub>37</sub> N <sub>2</sub> O <sub>7</sub> S <sup>+</sup> | 473.23160 | 473.23056 | -2.1977 | 0.53 |
|                 | MS <sup>2</sup> (473->)      | C <sub>22</sub> H <sub>35</sub> N <sub>2</sub> O <sub>6</sub> S <sup>+</sup> | 455.22103 | 455.21989 | -2.5043 |      |
|                 | MS <sup>2</sup> (473->)      | C <sub>22</sub> H <sub>33</sub> N <sub>2</sub> O <sub>5</sub> S <sup>+</sup> | 437.21047 | 437.20913 | -3.0649 |      |
|                 | MS <sup>2</sup> (473->)      | C <sub>21</sub> H <sub>35</sub> N <sub>2</sub> O <sub>5</sub> S <sup>+</sup> | 427.22612 | 427.22496 | -2.7152 |      |
|                 | MS <sup>2</sup> (473->)      | C <sub>21</sub> H <sub>33</sub> N <sub>2</sub> O <sub>4</sub> S <sup>+</sup> | 409.21755 | 409.21652 | -2.5170 |      |
|                 | MS <sup>2</sup> (473->)      | C <sub>21</sub> H <sub>33</sub> N <sub>2</sub> O <sub>3</sub> S <sup>+</sup> | 393.22064 | 393.21985 | -2.0091 |      |
|                 | MS <sup>2</sup> (473->)      | C <sub>18</sub> H <sub>29</sub> N <sub>2</sub> O <sub>5</sub> <sup>+</sup>   | 353.20710 | 353.20593 | -3.3125 |      |
|                 | MS <sup>2</sup> (473->)      | C <sub>17</sub> H <sub>27</sub> NO <sub>3</sub> <sup>+</sup>                 | 307.20162 | 307.20128 | -1.1068 |      |
|                 | MS <sup>2</sup> (473->)      | C <sub>17</sub> H <sub>25</sub> N <sub>2</sub> O <sub>2</sub> <sup>+</sup>   | 289.19105 | 289.19033 | -2.4897 |      |
|                 | MS <sup>3</sup> (473->289->) | C <sub>16</sub> H <sub>22</sub> NO <sub>2</sub> <sup>+</sup>                 | 260.16451 | 260.16409 | -1.6144 |      |
|                 | MS <sup>3</sup> (473->289->) | C <sub>14</sub> H <sub>20</sub> NO <sub>2</sub> <sup>+</sup>                 | 234.14886 | 234.14826 | -2.5625 |      |
|                 | MS <sup>3</sup> (473->289->) | C <sub>9</sub> H <sub>18</sub> NO <sup>+</sup>                               | 156.13829 | 156.13756 | -4.6753 |      |
|                 | MS <sup>3</sup> (473->289->) | C <sub>8</sub> H <sub>10</sub> NO <sup>+</sup>                               | 152.07060 | 152.06989 | -4.6689 |      |
|                 | MS <sup>3</sup> (473->289->) | C <sub>9</sub> H <sub>16</sub> N <sup>+</sup>                                | 138.12773 | 138.12731 | -3.0407 |      |
| <b>PD-5 (5)</b> | Precursor ion                | C <sub>22</sub> H <sub>37</sub> N <sub>2</sub> O <sub>6</sub> S <sup>+</sup> | 457.23668 | 457.23510 | -3.4555 | 0.56 |
|                 | MS <sup>2</sup> (457->)      | C <sub>22</sub> H <sub>35</sub> N <sub>2</sub> O <sub>5</sub> S <sup>+</sup> | 439.22612 | 439.22489 | -2.8004 |      |
|                 | MS <sup>2</sup> (457->)      | C <sub>21</sub> H <sub>35</sub> N <sub>2</sub> O <sub>3</sub> S <sup>+</sup> | 395.23629 | 395.23517 | -2.8337 |      |
|                 | MS <sup>2</sup> (457->)      | C <sub>21</sub> H <sub>32</sub> NO <sub>3</sub> S <sup>+</sup>               | 378.20974 | 378.20863 | -2.9349 |      |
|                 | MS <sup>2</sup> (457->)      | C <sub>18</sub> H <sub>29</sub> N <sub>2</sub> O <sub>4</sub> <sup>+</sup>   | 337.21218 | 337.21133 | -2.5207 |      |
|                 | MS <sup>2</sup> (457->)      | C <sub>17</sub> H <sub>26</sub> NO <sub>3</sub> <sup>+</sup>                 | 292.19072 | 292.19021 | -1.7454 |      |
|                 | MS <sup>2</sup> (457->)      | C <sub>9</sub> H <sub>18</sub> N <sup>+</sup>                                | 140.14338 | 140.14291 | -3.3537 |      |
| <b>PD-6 (5)</b> | Precursor ion                | C <sub>21</sub> H <sub>37</sub> N <sub>2</sub> O <sub>5</sub> S <sup>+</sup> | 429.24177 | 429.24093 | -1.9569 | 0.59 |
|                 | MS <sup>2</sup> (429->)      | C <sub>21</sub> H <sub>35</sub> N <sub>2</sub> O <sub>3</sub> S <sup>+</sup> | 395.23629 | 395.23552 | -1.9482 |      |
|                 | MS <sup>2</sup> (429->)      | C <sub>17</sub> H <sub>26</sub> NO <sub>3</sub> <sup>+</sup>                 | 292.19072 | 292.18985 | -2.9775 |      |
|                 | MS <sup>2</sup> (429->)      | C <sub>16</sub> H <sub>24</sub> NO <sub>2</sub> <sup>+</sup>                 | 262.18016 | 262.17933 | -3.1658 |      |
|                 | MS <sup>2</sup> (429->)      | C <sub>9</sub> H <sub>18</sub> N <sup>+</sup>                                | 140.14338 | 140.14278 | -4.2813 |      |

|                  |                |                         |           |           |         |      |
|------------------|----------------|-------------------------|-----------|-----------|---------|------|
| <b>PD-7 (6)</b>  | Precursor ion  | $C_{22}H_{37}N_2O_7S^+$ | 473.23160 | 473.23054 | -2.2399 | 0.72 |
|                  | $MS^2$ (473->) | $C_{22}H_{35}N_2O_5S^+$ | 439.22612 | 439.22490 | -2.7776 |      |
|                  | $MS^2$ (473->) | $C_{21}H_{35}N_2O_5S^+$ | 427.22612 | 427.22481 | -3.0663 |      |
|                  | $MS^2$ (473->) | $C_{21}H_{35}N_2O_3S^+$ | 395.23629 | 395.23513 | -2.9350 |      |
|                  | $MS^2$ (473->) | $C_{18}H_{29}N_2O_5S^+$ | 353.20710 | 353.20634 | -2.1517 |      |
|                  | $MS^2$ (473->) | $C_{16}H_{24}NO_2^+$    | 262.18016 | 262.17942 | -2.8225 |      |
|                  | $MS^2$ (473->) | $C_9H_{18}N^+$          | 140.14338 | 140.14287 | -3.6391 |      |
| <b>PD-8 (4)</b>  | Precursor ion  | $C_{22}H_{35}N_2O_6S^+$ | 455.22103 | 455.22002 | -2.2187 | 0.74 |
|                  | $MS^2$ (455->) | $C_{22}H_{33}N_2O_5S^+$ | 437.21047 | 437.20987 | -1.3723 |      |
|                  | $MS^2$ (455->) | $C_{21}H_{33}N_2O_3S^+$ | 393.22064 | 393.21954 | -2.7974 |      |
|                  | $MS^2$ (455->) | $C_{22}H_{33}N_2O_3^+$  | 373.24857 | 373.24753 | -2.7863 |      |
|                  | $MS^2$ (455->) | $C_{21}H_{33}N_2O^+$    | 329.25874 | 329.25773 | -3.0675 |      |
|                  | $MS^2$ (455->) | $C_{18}H_{29}N_2O_3^+$  | 321.21727 | 321.21630 | -3.0198 |      |
|                  | $MS^2$ (455->) | $C_{17}H_{26}NO_2^+$    | 276.19581 | 276.19491 | -3.2586 |      |
|                  | $MS^2$ (455->) | $C_{17}H_{27}N_2O^+$    | 275.21179 | 275.21097 | -2.9795 |      |
|                  | $MS^2$ (455->) | $C_{17}H_{25}NO^+$      | 260.20089 | 260.19995 | -3.6126 |      |
|                  | $MS^2$ (455->) | $C_9H_{18}N^+$          | 140.14338 | 140.14289 | -3.4536 |      |
| <b>PD-9 (5)</b>  | Precursor ion  | $C_{22}H_{37}N_2O_6S^+$ | 457.23668 | 457.23534 | -2.9306 | 0.89 |
|                  | $MS^2$ (457->) | $C_{21}H_{33}N_2O_3S^+$ | 393.22064 | 393.22011 | -1.3478 |      |
|                  | $MS^2$ (457->) | $C_{18}H_{28}NO_3S^+$   | 338.17844 | 338.17803 | -1.2124 |      |
|                  | $MS^2$ (457->) | $C_{18}H_{29}N_2O_4^+$  | 337.21218 | 337.21163 | -1.6310 |      |
|                  | $MS^2$ (457->) | $C_{17}H_{26}NO_3^+$    | 292.19072 | 292.18997 | -2.5668 |      |
|                  | $MS^2$ (457->) | $C_{17}H_{24}NO_2^+$    | 274.18016 | 274.17970 | -1.6777 |      |
|                  | $MS^2$ (457->) | $C_9H_{18}NO^+$         | 156.13829 | 156.13795 | -2.1776 |      |
|                  | $MS^2$ (457->) | $C_9H_{16}N^+$          | 138.12773 | 138.12713 | -4.3438 |      |
| <b>PD-10 (5)</b> | Precursor ion  | $C_{22}H_{37}N_2O_6S^+$ | 457.23668 | 457.23504 | -3.5868 | 0.9  |
|                  | $MS^2$ (457->) | $C_{22}H_{35}N_2O_5S^+$ | 439.22612 | 439.22491 | -2.7548 |      |
|                  | $MS^2$ (457->) | $C_{21}H_{35}N_2O_4S^+$ | 411.23120 | 411.23012 | -2.6263 |      |
|                  | $MS^2$ (457->) | $C_{21}H_{32}NO_4S^+$   | 394.20466 | 394.20385 | -2.0548 |      |
|                  | $MS^2$ (457->) | $C_{21}H_{32}NO_2^+$    | 330.20466 | 330.20418 | -1.4536 |      |
|                  | $MS^2$ (457->) | $C_{18}H_{29}N_2O_3^+$  | 321.21727 | 321.21658 | -2.1481 |      |
|                  | $MS^2$ (457->) | $C_{17}H_{26}NO_2^+$    | 276.19581 | 276.19506 | -2.7155 |      |
|                  | $MS^2$ (457->) | $C_{17}H_{27}N_2O^+$    | 275.21179 | 275.21132 | -1.7078 |      |
|                  | $MS^2$ (457->) | $C_{17}H_{25}NO^+$      | 260.20089 | 260.20021 | -2.6134 |      |
|                  | $MS^2$ (457->) | $C_9H_{18}N^+$          | 140.14338 | 140.14270 | -4.8522 |      |
| <b>PD-11 (4)</b> | Precursor ion  | $C_{21}H_{37}N_2O_4S^+$ | 413.24685 | 413.24575 | -2.6618 | 0.95 |

|                  |                         |                                                                              |           |           |         |      |
|------------------|-------------------------|------------------------------------------------------------------------------|-----------|-----------|---------|------|
|                  | MS <sup>2</sup> (413->) | C <sub>21</sub> H <sub>35</sub> N <sub>2</sub> O <sub>3</sub> S <sup>+</sup> | 395.23629 | 395.23521 | -2.7325 |      |
|                  | MS <sup>2</sup> (413->) | C <sub>17</sub> H <sub>26</sub> NO <sub>2</sub> <sup>+</sup>                 | 276.19581 | 276.19517 | -2.3172 |      |
|                  | MS <sup>2</sup> (413->) | C <sub>9</sub> H <sub>18</sub> N <sup>+</sup>                                | 140.14338 | 140.14287 | -3.6391 |      |
| <b>PD-12 (6)</b> | Precursor ion           | C <sub>22</sub> H <sub>37</sub> N <sub>2</sub> O <sub>7</sub> S <sup>+</sup> | 473.23160 | 473.23081 | -1.6694 | 0.97 |
|                  | MS <sup>2</sup> (473->) | C <sub>22</sub> H <sub>35</sub> N <sub>2</sub> O <sub>6</sub> S <sup>+</sup> | 455.22103 | 455.22041 | -1.3620 |      |
|                  | MS <sup>2</sup> (473->) | C <sub>22</sub> H <sub>33</sub> N <sub>2</sub> O <sub>3</sub> <sup>+</sup>   | 437.21047 | 437.20925 | -2.7904 |      |
|                  | MS <sup>2</sup> (473->) | C <sub>21</sub> H <sub>33</sub> N <sub>2</sub> O <sub>3</sub> S <sup>+</sup> | 393.22064 | 393.21983 | -2.0599 |      |
|                  | MS <sup>2</sup> (473->) | C <sub>22</sub> H <sub>33</sub> N <sub>2</sub> O <sub>3</sub> <sup>+</sup>   | 373.24857 | 373.24793 | -1.7147 |      |
|                  | MS <sup>2</sup> (473->) | C <sub>21</sub> H <sub>33</sub> N <sub>2</sub> O <sup>+</sup>                | 329.25874 | 329.25790 | -2.5512 |      |
|                  | MS <sup>2</sup> (473->) | C <sub>18</sub> H <sub>29</sub> N <sub>2</sub> O <sub>3</sub> <sup>+</sup>   | 321.21727 | 321.21654 | -2.2726 |      |
|                  | MS <sup>2</sup> (473->) | C <sub>17</sub> H <sub>26</sub> NO <sub>2</sub> <sup>+</sup>                 | 276.19581 | 276.19532 | -1.7741 |      |
|                  | MS <sup>2</sup> (473->) | C <sub>17</sub> H <sub>27</sub> N <sub>2</sub> O <sup>+</sup>                | 275.21179 | 275.21093 | -3.1249 |      |
|                  | MS <sup>2</sup> (473->) | C <sub>17</sub> H <sub>25</sub> NO <sup>+</sup>                              | 260.20089 | 260.19973 | -4.4581 |      |
|                  | MS <sup>2</sup> (473->) | C <sub>9</sub> H <sub>18</sub> N <sup>+</sup>                                | 140.14338 | 140.14270 | -4.8522 |      |

**PD-1**

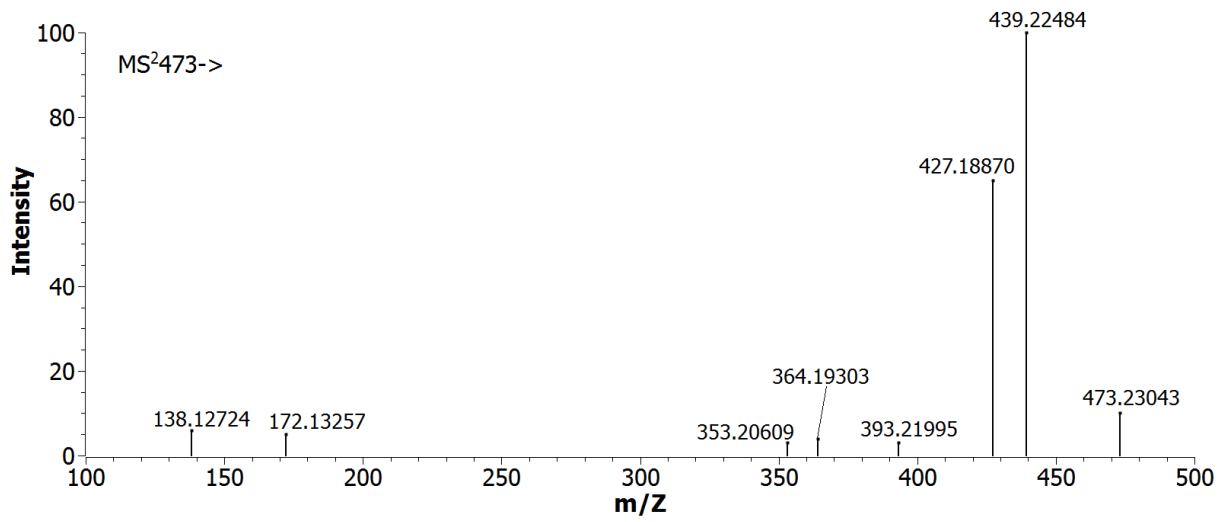

**PD-2**

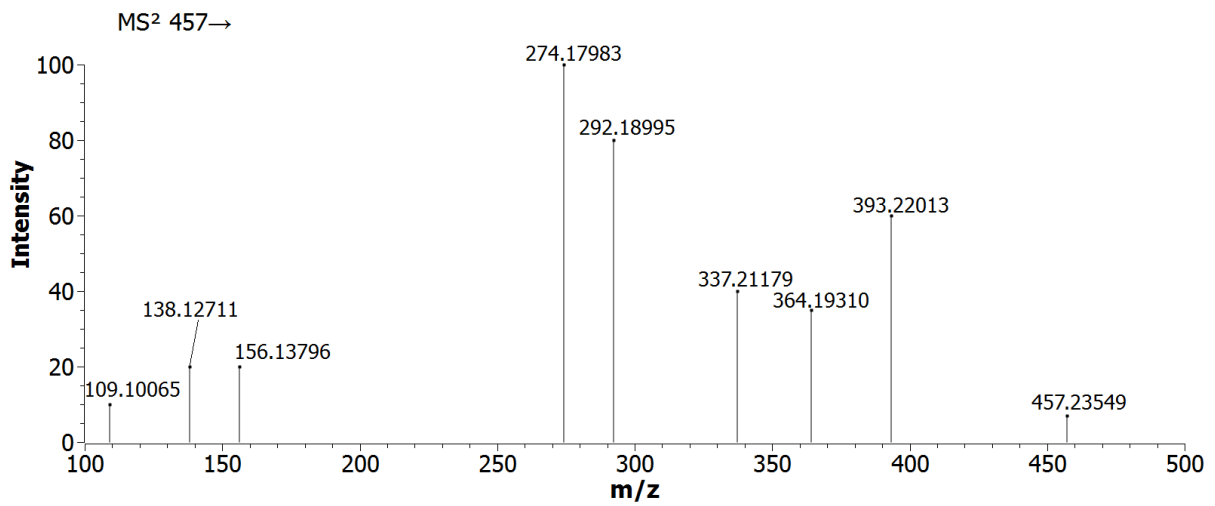

**PD-3**

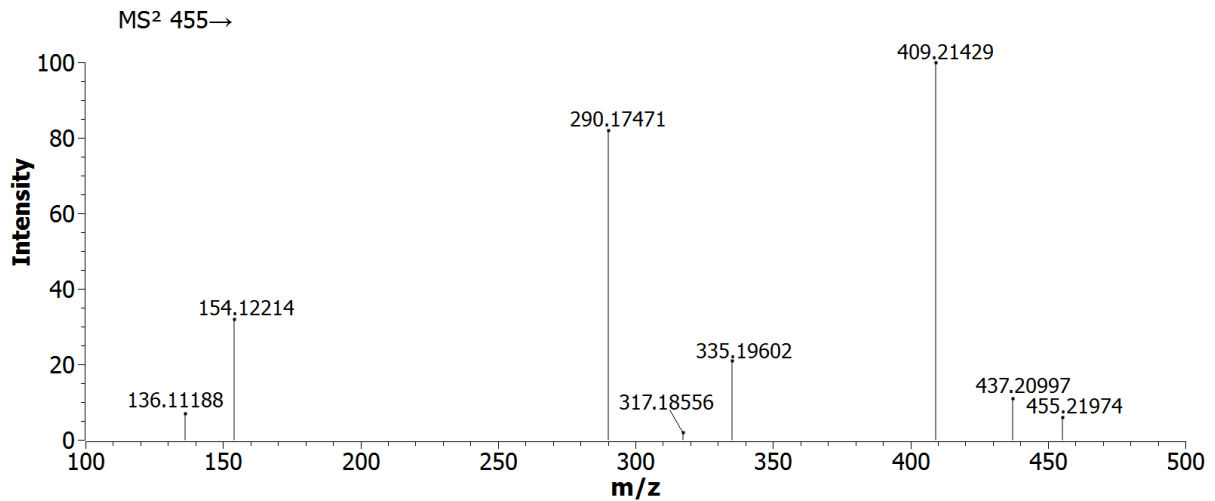

**PD-4**

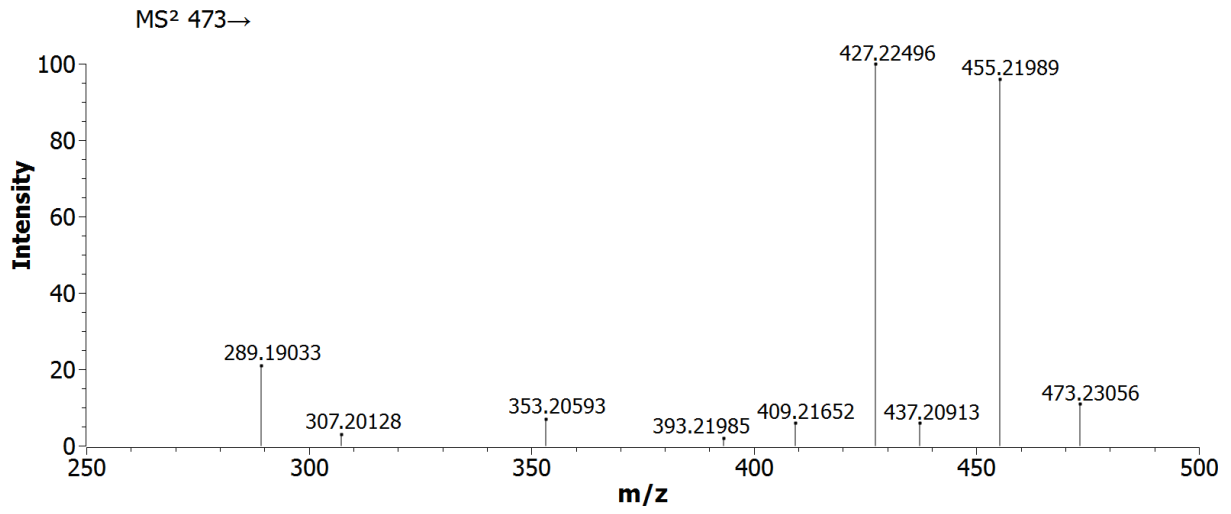

**PD-4**

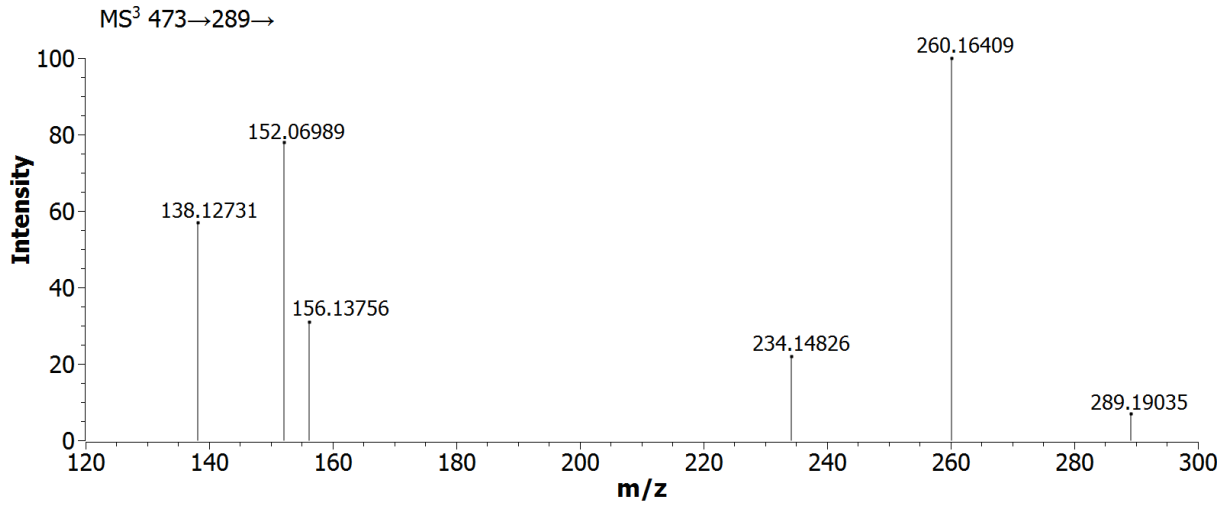

**PD-5**

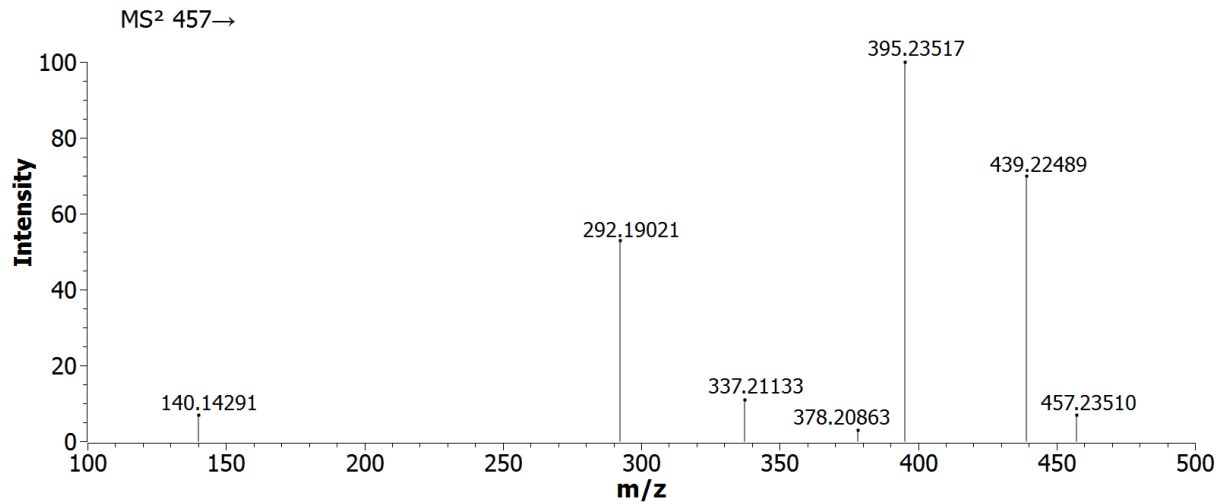

**PD-6**

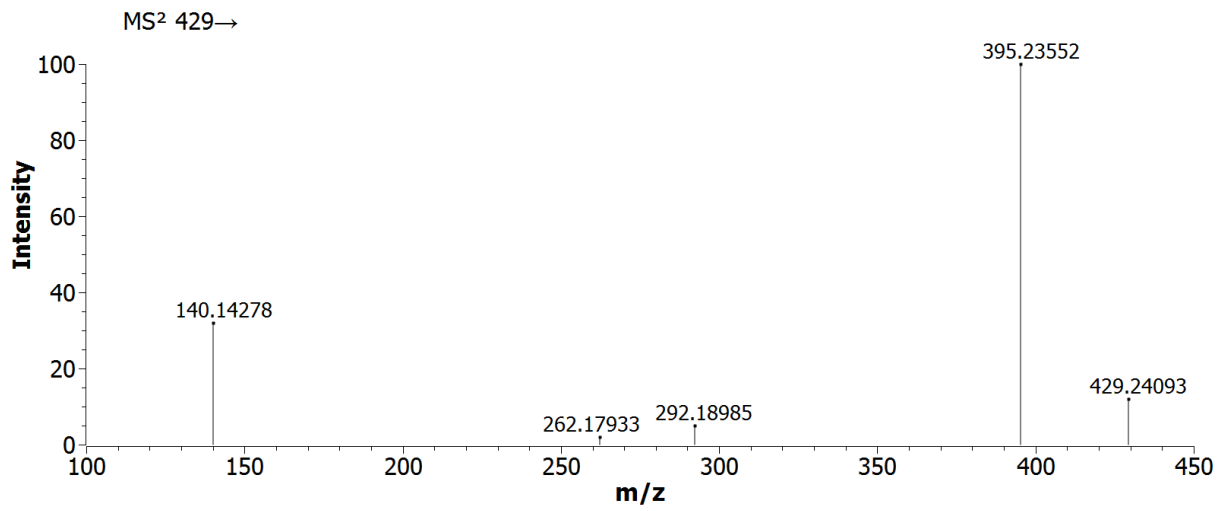

**PD-7**

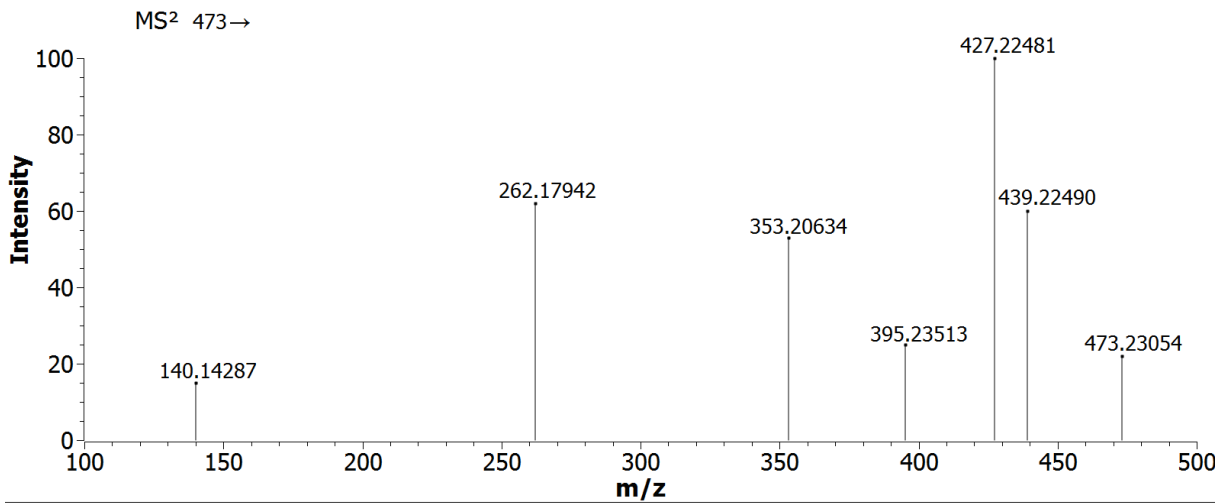

**PD-8**

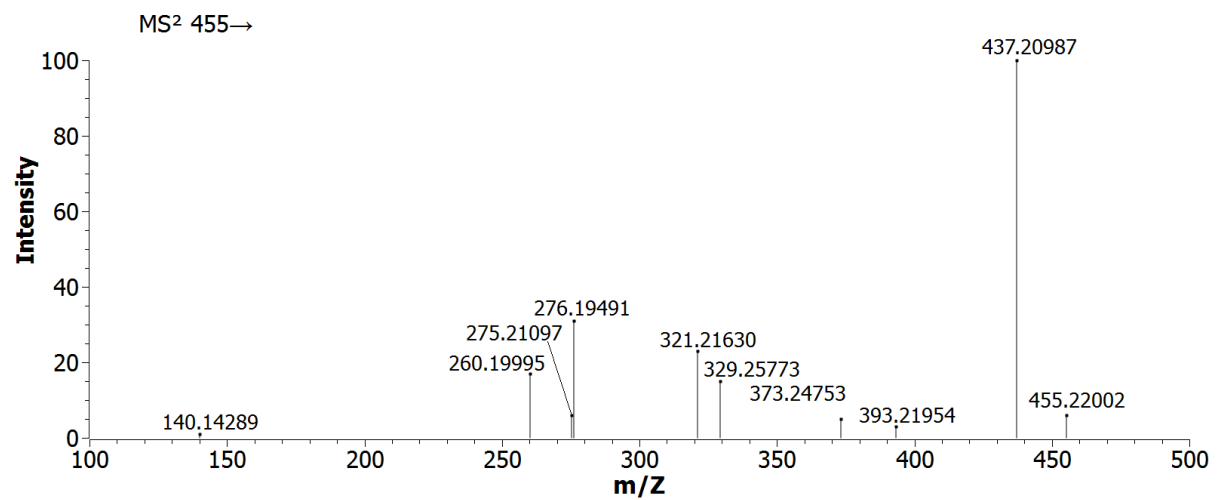

**PD-9**

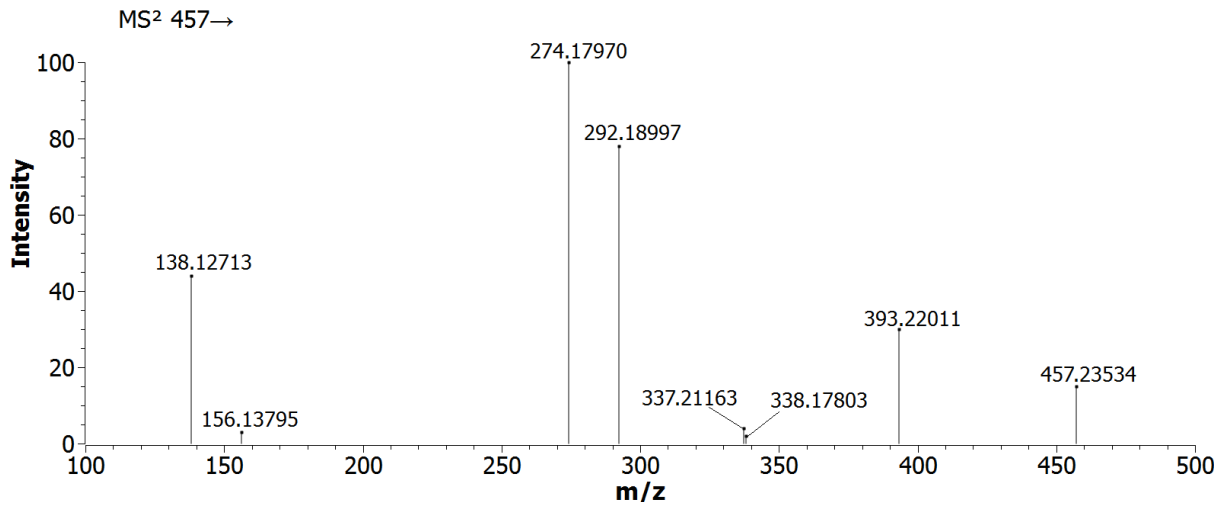

**PD-10**

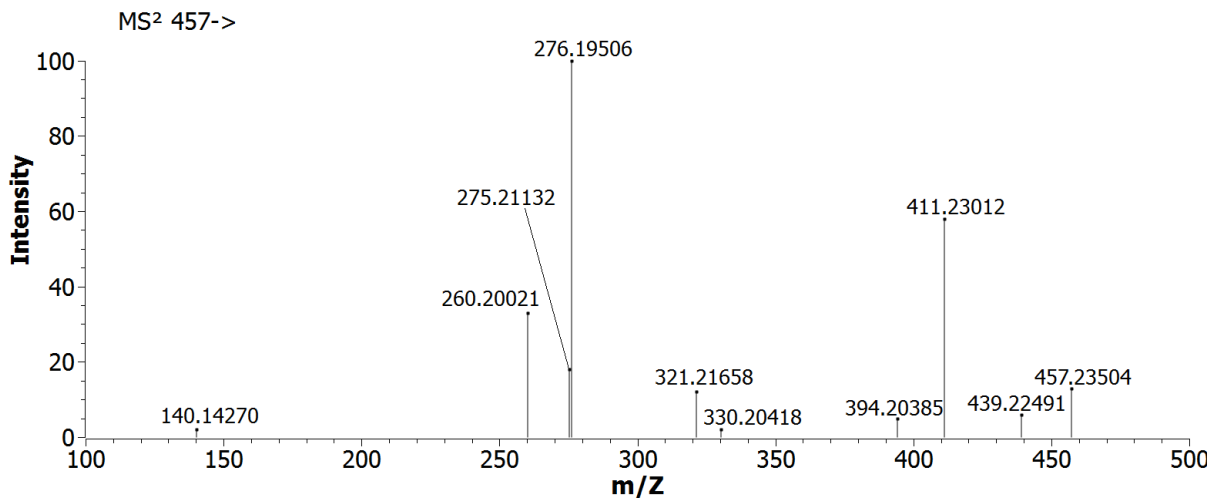

**PD-11**

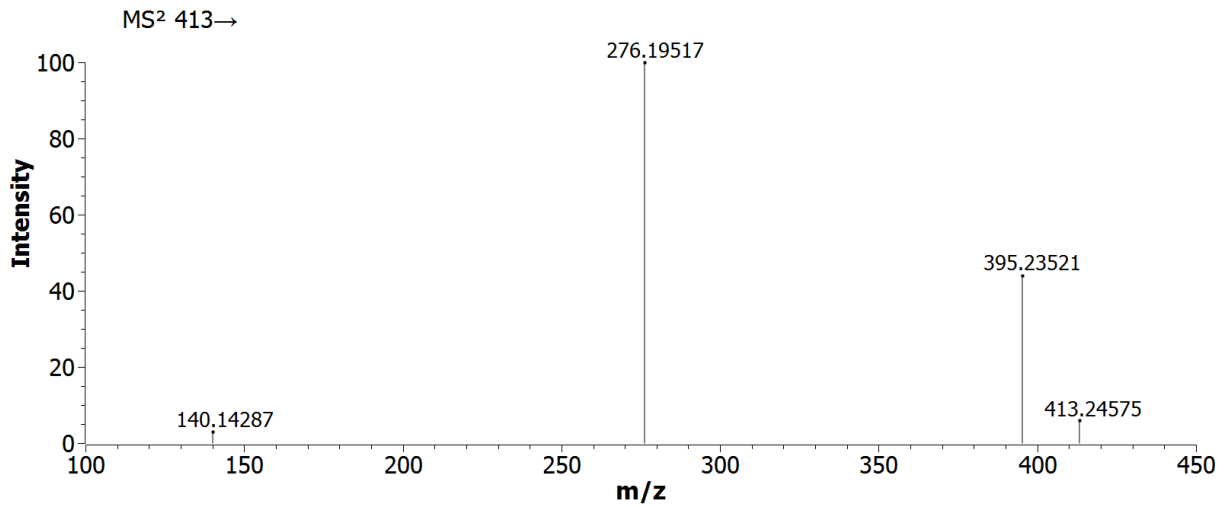



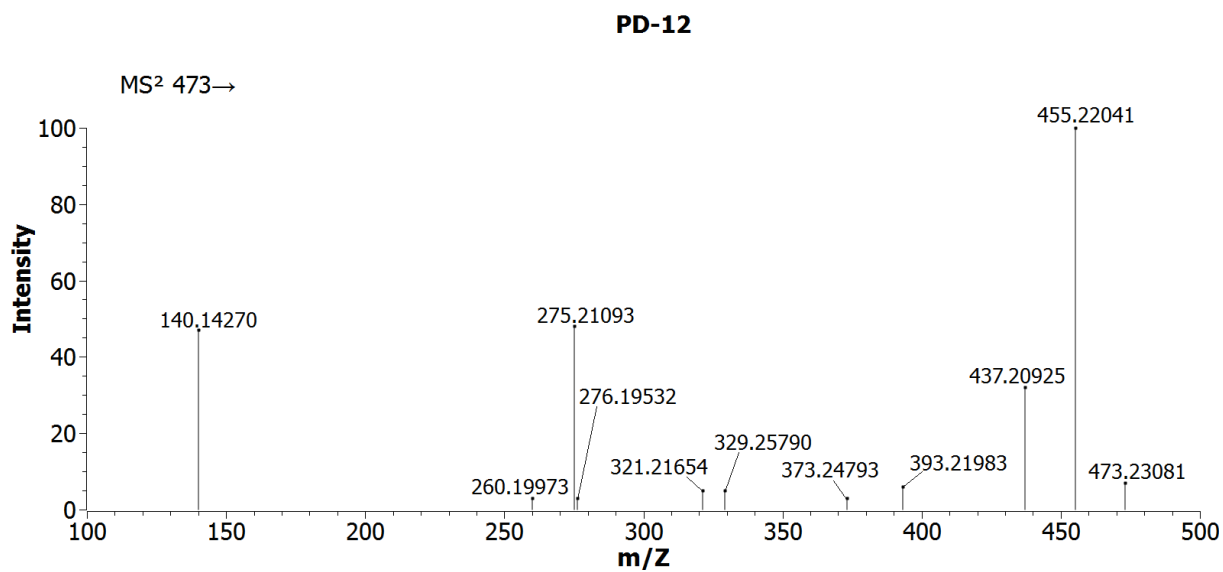

**Figure S2.** Representative LC-ESI/MS<sup>2</sup> spectra of photoproducts (PD-1 – PD-12) and representative LC-ESI/MS<sup>3</sup> spectrum of PD-4.
